# Supplementary material for: A pyridyl carboxamide molecule selectively stabilizes DNA G-quadruplex and regulates duplex–quadruplex competition
Source: Royal Society of Chemistry journal article supplement (doi:10.1039/c1ra00851j), 2011-12-01
Supplement: c1ra00851j.pdf [file c1ra00851j.pdf]

## A Pyridyl Carboxamide Molecule Selectively Stabilizes G-quadruplex and Regulates Duplex-Quadruplex Competition

Liang Xu, Weixin Wu, Jie Ding, Shuo Feng, Xiwen Xing Minggang Deng and Xiang Zhou\*

College of Chemistry and Molecular Sciences, Key Laboratory of Biomedical Polymers of Ministry of Education, State Key Laboratory of Virology, Wuhan University, Hubei, Wuhan, 430072, P. R. of China. \* E-mail: [xzhou@whu.edu.cn](mailto:xzhou@whu.edu.cn)

### Supplementary Information

#### Synthesis of Py-Am.

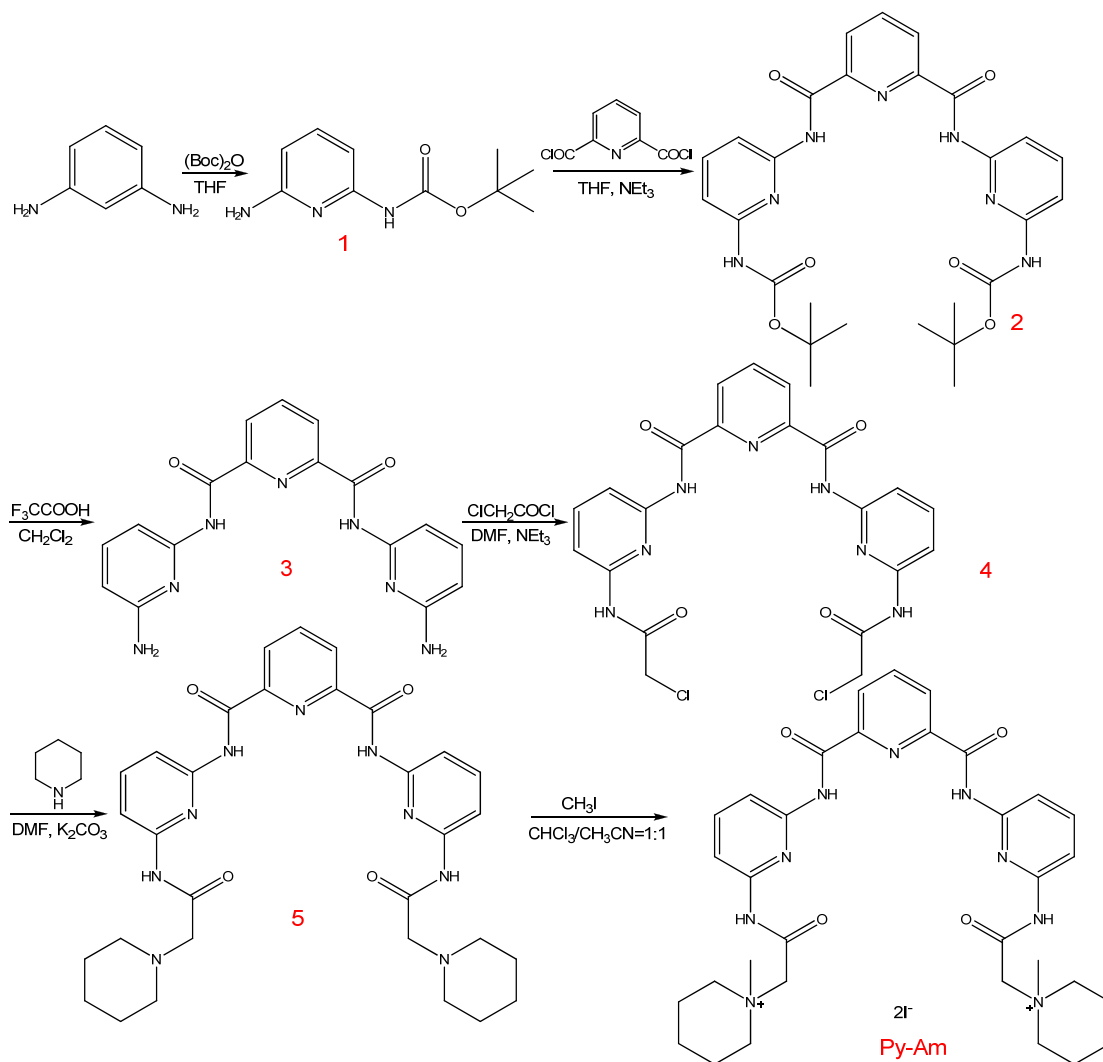

Compounds 1 and 2 were synthesized with the reported methods.<sup>1</sup>

Synthesis of compound 3(2,6-Bis-(6-aminopyridin-2-ylcarbamoyl)pyridine). Compound 2 (1 g, 1.82 mmol) was dissolved into 20 mL  $\text{CH}_2\text{Cl}_2$  under the ice bath. After the addition of 2 mL  $\text{F}_3\text{CCOOH}$ , the mixture was further stirred at r. t. for 12 h. The reaction mixture was concentrated under reduced pressure and then treated with 20 mL 2 mol/L NaOH. The precipitate was filtrated, washed with water, and finally dried to afford white powder compound 3 (620 mg, 97.5%).

$^1\text{H}$  NMR (300 MHz,  $[\text{D}_6]$  DMSO)  $\delta$  = 11.04 (s, 2H), 8.23-8.31 (m, 3H), 7.39-7.45 (m, 4H), 6.28 (d,  $J$  = 7.5 Hz, 2H), 5.89 (br, 4H) ppm.

$^{13}\text{C}$  NMR (75 MHz, [D<sub>6</sub>] DMSO)  $\delta$  = 162.7, 159.3, 150.3, 149.7, 140.4, 139.8, 126.0, 105.1, 120.7 ppm.

HRMS(ESI):  $m/z$ : calculated for  $\text{C}_{17}\text{H}_{15}\text{N}_7\text{O}_2$ : 350.1360 ( $\text{M}+\text{H}^+$ ); found: 350.1365 ( $\text{M}+\text{H}^+$ ).

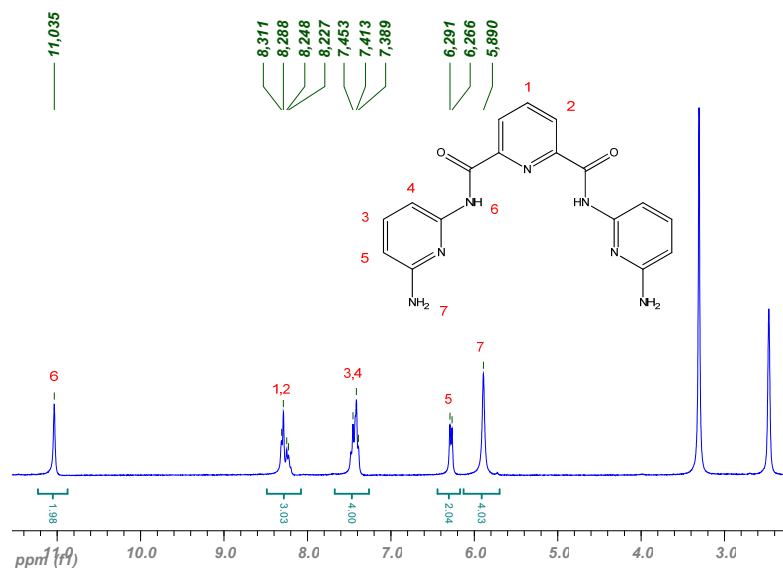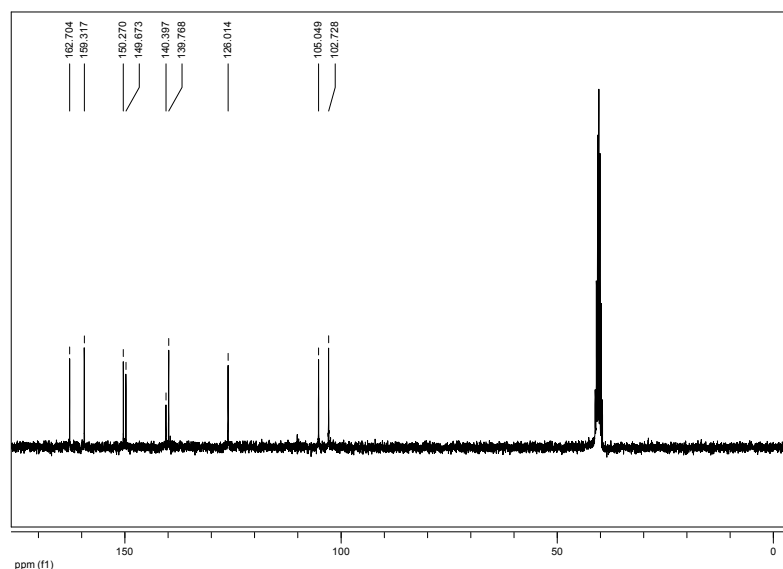

Synthesis of compound 4 (2,6-Bis-(6-chloroacetylaminopyridin-2-ylcarbamoyl)pyridine). Compound 3 (349 mg, 1mmol) was dissolved into the mixture of dry DMF (20 mL) and  $\text{Et}_3\text{N}$  (1 g).  $\text{ClCH}_2\text{COCl}$  (600 mg) was then slowly added into the stirring mixture at r. t. The mixture was further stirred for 2 h, and then concentrated under reduced pressure. The crude product was purified by column chromatography over silica gel ( $\text{CH}_2\text{Cl}/\text{CH}_3\text{COOCH}_2\text{CH}_3 = 3/1-2/1$ ) to afford compound 4 as white powder (328 mg, 65.6%).

$^1\text{H}$  NMR (300 MHz, [D<sub>6</sub>] DMSO)  $\delta$  = 11.26 (s, 2H), 10.49 (s, 2H), 8.31-8.41 (m, 3H), 7.84-7.98 (m, 6H), 4.38 (s, 4H) ppm.

$^{13}\text{C}$  NMR (75 MHz, [D<sub>6</sub>] DMSO)  $\delta$  = 165.9, 162.7, 150.4, 150.0, 149.0, 141.2, 140.6, 126.2, 111.7, 110.5, 43.8 ppm.

HRMS(ESI):  $m/z$ : calculated for  $\text{C}_{21}\text{H}_{17}\text{N}_7\text{O}_4\text{Cl}_2$ : 502.0792 ( $\text{M}+\text{H}^+$ ); found: 502.0800 ( $\text{M}+\text{H}^+$ ).

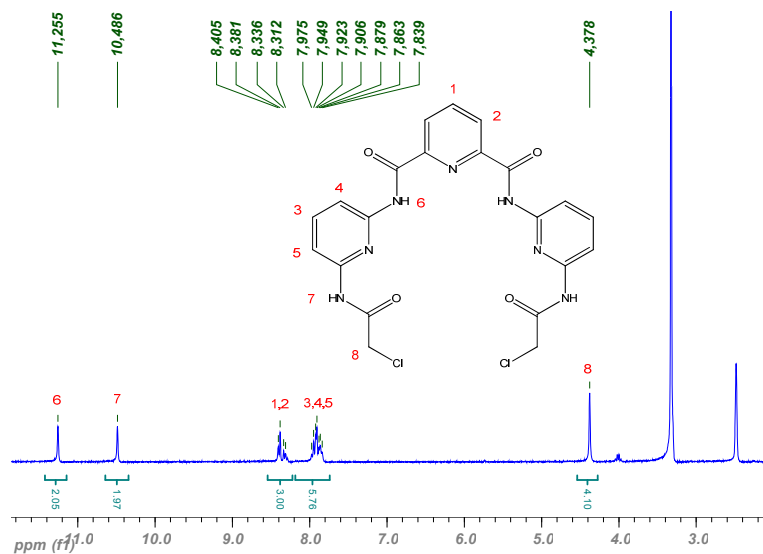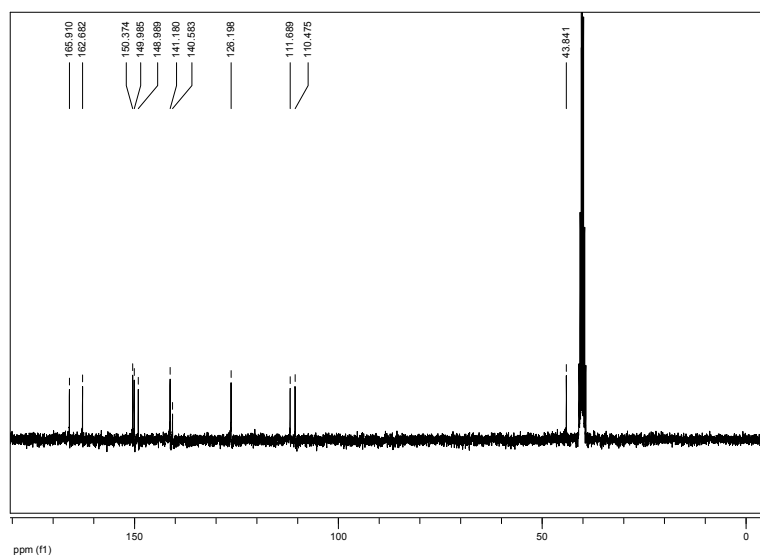

Synthesis of compound 5 (2,6-Bis-(6-piperidyl-*N*-acetylaminopyridin-2-ylcarbamoyl)pyridine). Excess piperidine (2 mL) was added into the mixture of compound 4 (251 mg, 0.5 mmol), DMF (20 mL) and  $K_2CO_3$  (1 g). The mixture was stirred at 90 °C for 12 h, then filtered and concentrated under reduced pressure. The crude product was purified by column chromatography over silica gel ( $CH_2Cl_2$ /petroleum ether = 2/1) to afford compound 5 as white powder (140 mg, 46.7%).

$^1H$  NMR (300 MHz,  $CDCl_3$ )  $\delta$  = 10.20 (s, 2H), 9.57 (s, 2H), 8.12-8.20 (m, 3H), 7.92 (d,  $J$  = 7.8 Hz, 2H), 7.82 (t,  $J$  = 7.8 Hz, 2H), 3.09 (s, 4H), 2.51 (br, 8H), 1.60 (br, 8H), 1.39 (br, 4H) ppm.

$^{13}C$  NMR (75 MHz,  $CDCl_3$ )  $\delta$  = 171.3, 163.8, 151.4, 151.2, 150.7, 142.6, 141.3, 127.8, 112.4, 111.8, 64.7, 56.7, 27.9, 25.4 ppm.

HRMS(ESI):  $m/z$ : calculated for  $C_{31}H_{37}N_9O_4$ : 600.3041 ( $M+H^+$ ); found: 600.3037 ( $M+H^+$ ).



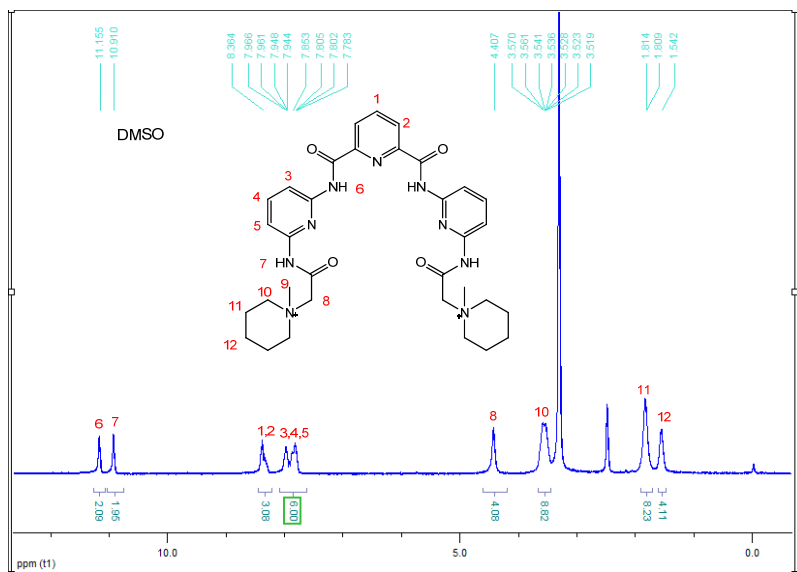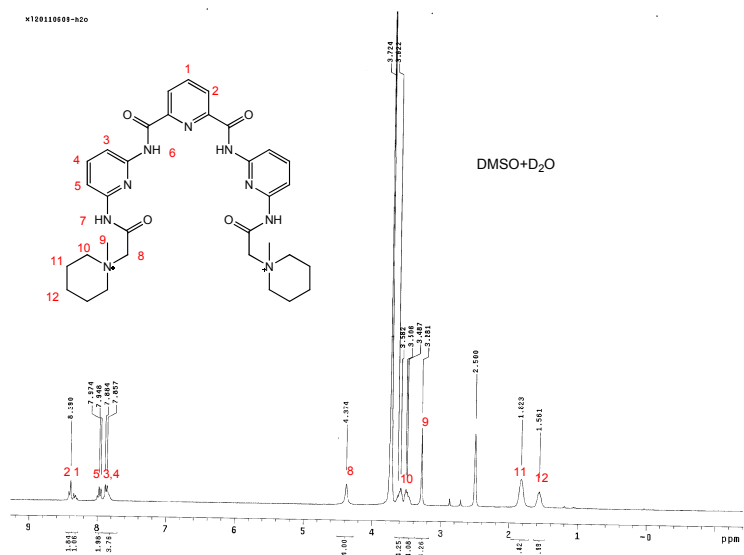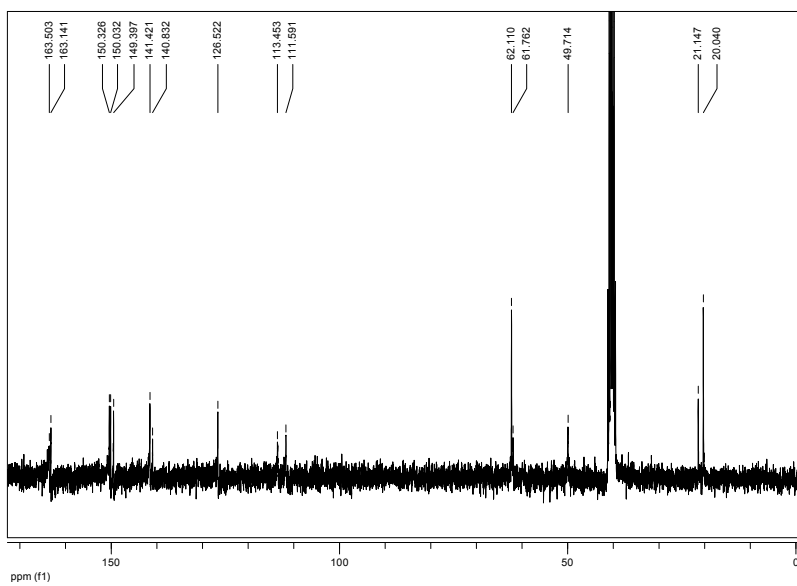

## Figures.

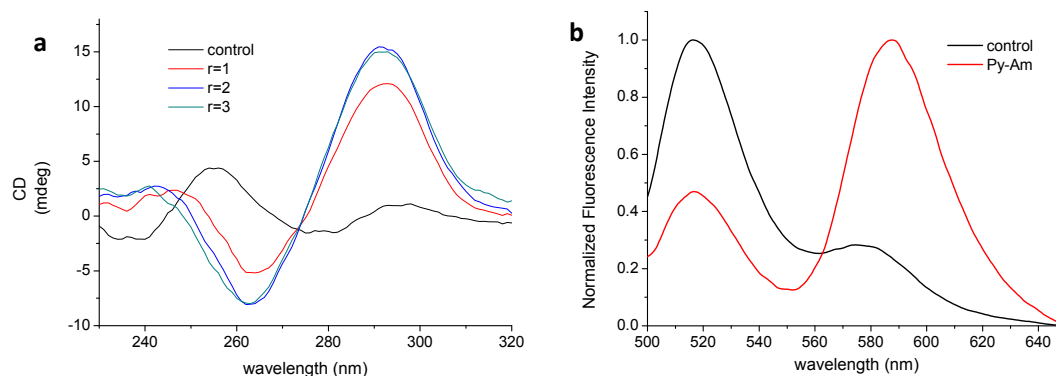

**Fig. S1.** G-quadruplex formation of the telomere DNA induced by Py-Am. a, CD spectra of G4A. Conditions: 20  $\mu$ M G4A, 10mM Tris-HCl. r: mol ratio of Py-Am to G4A. b, FRET induced by Py-Am. Blue curve is the spectrum of the control sample containing 50 nM F21T, 10 mM Tris-HCl; red curve is the spectrum of the sample added 500 nM Py-Am.

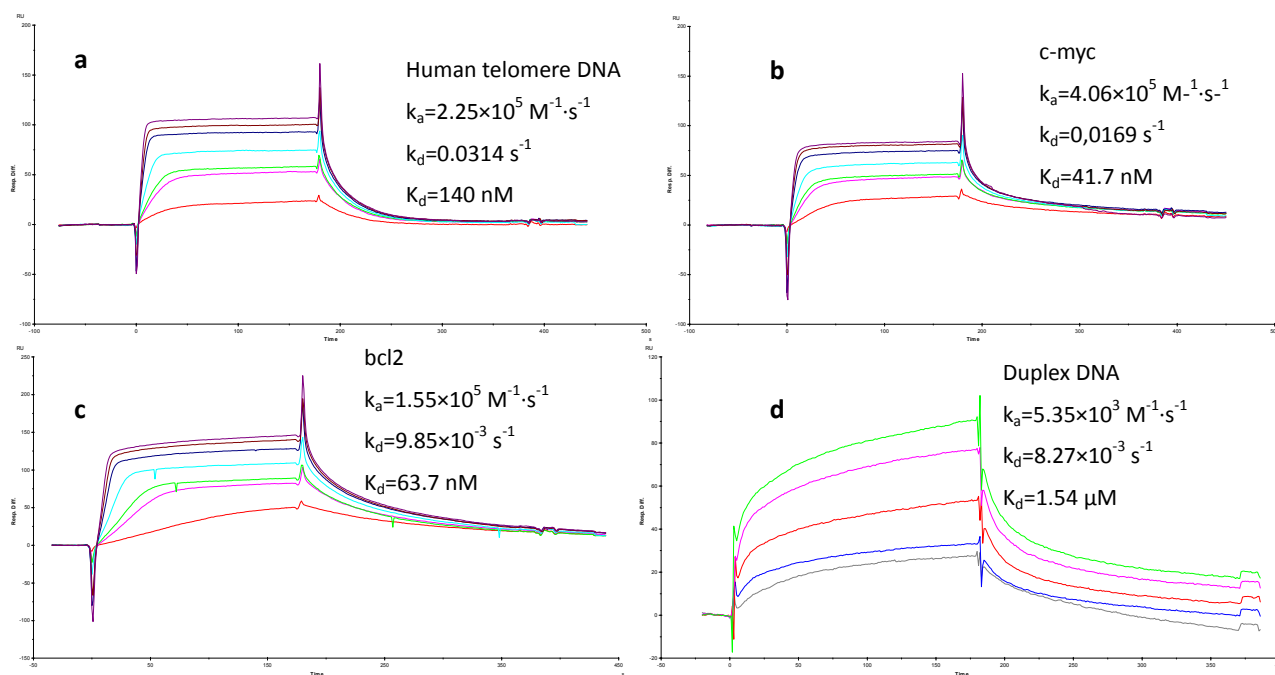

**Fig. S2.** SPR sensorgram overlay for binding of Py-Am to G-quadruplex (a, b and c) and duplex (d) at 25 °C. The unbound ligand concentrations in the flow solution were 50, 100, 150, 200, 400, 500, 600 nM from the lowest curve to the top curve for G-quadruplex, and the unbound ligand concentrations in the flow solution were 200, 300, 60, 800, 1200 nM from the lowest curve to the top curve for duplex.

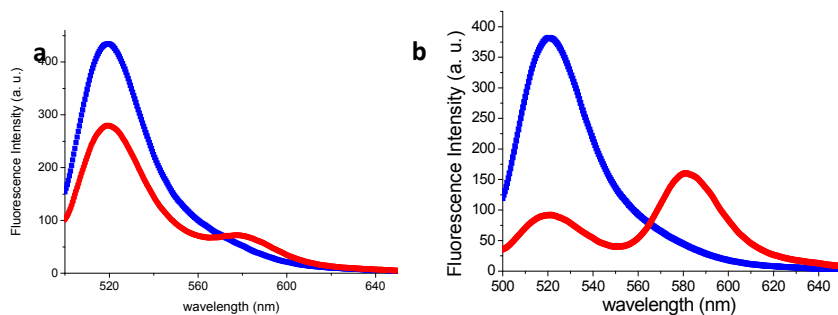

**Fig. S3.** G-quadruplex formation in the presence of Py-Am. a, fluorescence spectra of F-ckit-T in the absence (blue) and presence (red) of Py-Am. Measurements were carried out under these conditions: 50 nM F-ckit-T, 55 nM ckit-c, 100mM KCl and 10mM Tris-HCl buffer. Herein, the concentration of c-kit-c was a little more than that of F-ckit-T in order to make the F-ckit-T can totally form duplexes. 1 $\mu$ M Py-Am was added to study its transformation ability. The samples were all heated at 95  $^{\circ}$ C for 5 min and then slowly cooled down to the room temperature before measurement. b, fluorescence spectra of F21T in the absence (blue) and presence (red) of Py-Am. Measurements were carried out under these conditions: 50 nM F21T, 55 nM 21G-c, 100mM KCl and 10mM Tris-HCl buffer. Samples were treated with the same procedure as the former ones.

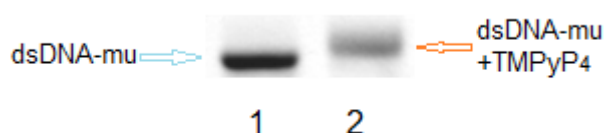

**Fig. S4.** Gel analysis of TMPyP4 with duplex DNA. The long dsDNA without G-quadruplex forming region (dsDNA-mu) was selected in this gel analysis experiment. Each sample included 1 $\mu$ M FAM labeled DNA. Lane 1: dsDNA-mu alone; Lane 2: dsDNA-mu treated with TMPyP4 (50  $\mu$ M). Both the two samples were treated with heat denaturation and renaturation before loaded onto the gel. We could easily find that even if no G-quadruplex could form within this long duplex DNA, TMPyP4 could still interact with the duplex structure to make the duplex migrate a little slower. This result demonstrated that the slightly slower migration of the c-myc long dsDNA treated with TMPyP4 (see the text, Figure 5, Lane 7) was not because of the formation of G-quadruplex but due to the interaction between TMPyP4 and the duplex structure.

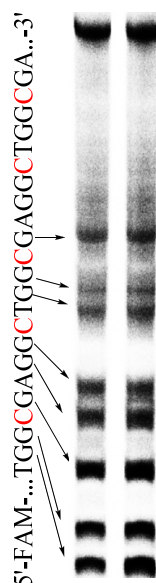

**Fig. S5.** DMS foot printing for dsDNA-mu. The left lane was the sample of the long dsDNA without Py-Am; the right lane was the sample treated with Py-Am. It was clearly that no difference between the samples in the absence and presence of Py-Am could be observed.

**Ref:**

1. E. Kolomiets, V. Berl, J. M. Lehn *Chem. Eur. J.* 2007, **13**, 5466–5479.
